# Supplementary material for: Enhanced Na+ pseudocapacitance in a P, S co-doped carbon anode arising from the surface modification by sulfur and phosphorus with C–S–P coupling
Source: Royal Society of Chemistry journal article supplement (doi:10.1039/c9ta11594c), 2019-12-02
Supplement: c9ta11594c1.pdf [file c9ta11594c1.pdf]

## Enhanced Na<sup>+</sup> pseudocapacitance in P-S co-doping carbon anode: raising from the surface modification by sulfur and phosphorus with C-S-P coupling

Jie Yan,<sup>a</sup> Wei Li,<sup>b</sup> Pingyuan Feng,<sup>a</sup> Ruxing Wang,<sup>b</sup> Mao Jiang,<sup>a</sup> Jing Han,<sup>a</sup> Shengling Cao,<sup>a</sup> Kangli Wang,<sup>\*b</sup> and Kai Jiang<sup>\*b</sup>

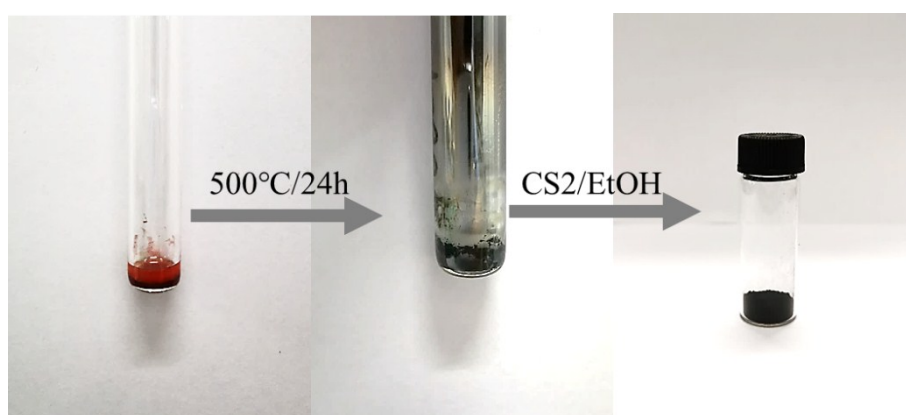

Figure S1. the digital picture of the synthetic process of PSC

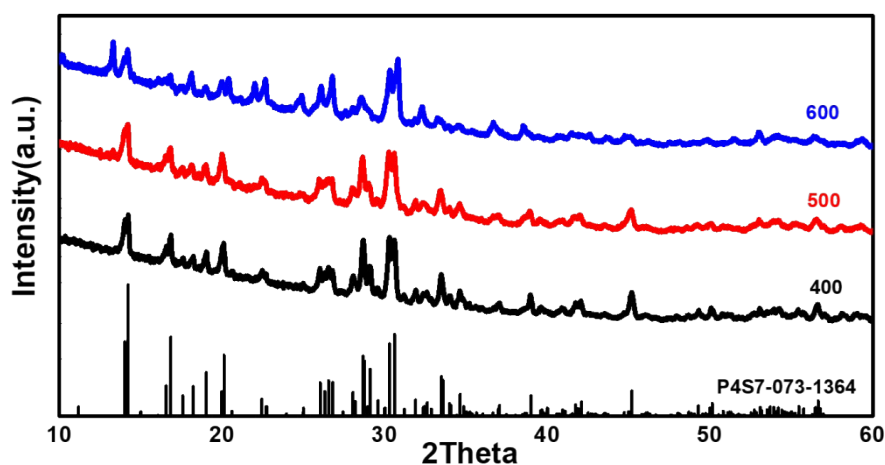

Figure S2. the resultant of CS<sub>2</sub> and RP after different temperature for 24 h (before washing).

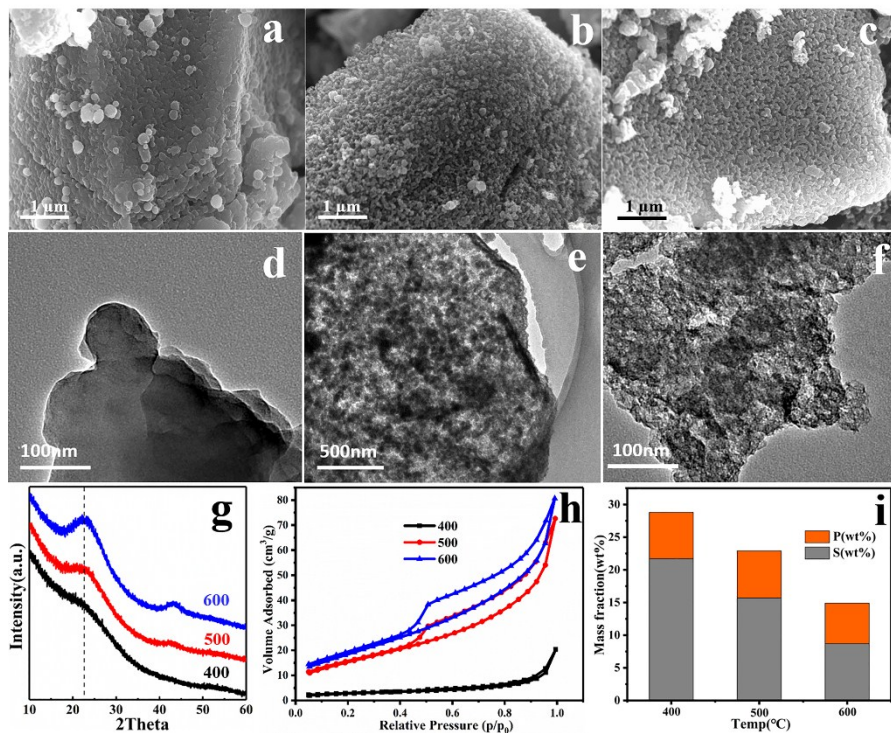

Figure S3. (a), (b), (c) FESEM images; (d), (e), (f) TEM images of the PSC obtained at 400, 500, 600 °C. (g) XRD patterns, (h) N<sub>2</sub> adsorption desorption isotherms and (i) the P and S contents of the PSC obtained at 400, 500, 600 °C.

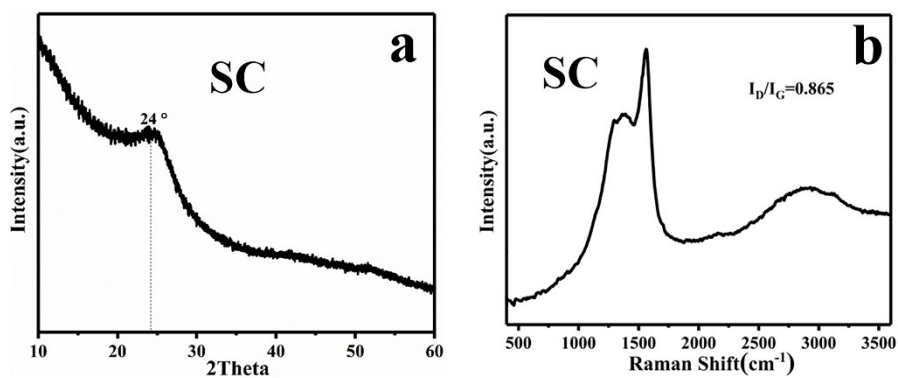

Figure S4. (a) XRD pattern and (b) Raman spectra of SC.

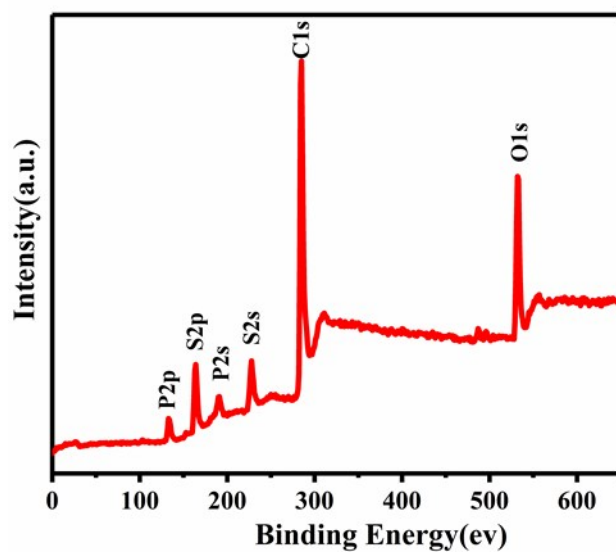

Figure S5. The survey XPS spectrum of PSC obtained at 500°C

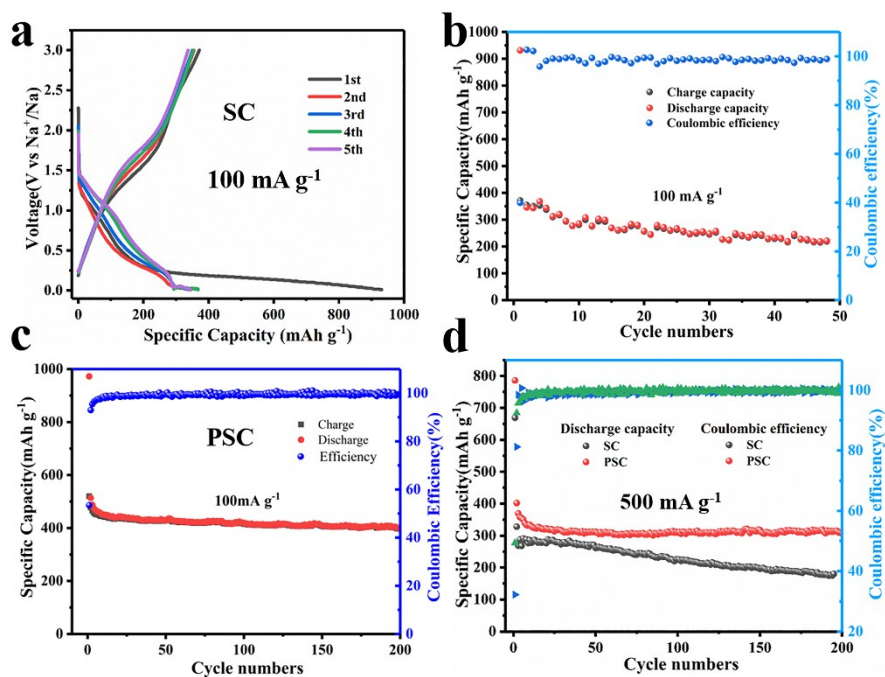

Figure S6. (a) Voltage profiles of SC at 100 mA g<sup>-1</sup>, (b) cycling performance and coulombic efficiency of SC at 100 mA g<sup>-1</sup>, (c) cycling performance and coulombic efficiency of PSC at 100 mA g<sup>-1</sup>, (d) cycling performance and coulombic efficiency of SC, PSC at 500 mA g<sup>-1</sup>.

Table S1. The atomic ratios of P to S in the raw materials and the practical atomic ratios of P to S doped in the PSCs (obtained at 500°C for 24h).

| RP(mg):CS <sub>2</sub> ( $\mu$ l)         | 100:100 | 100:150 | 100:250 | 100:300 |
|-------------------------------------------|---------|---------|---------|---------|
| P/S(atomic ratio)<br>In the raw materials | 1:1     | 1:1.5   | 1:2.5   | 1:3     |
| P/S(atomic ratio)<br>In the PSC           | 0.85    | 0.66    | 0.47    | 0.48    |

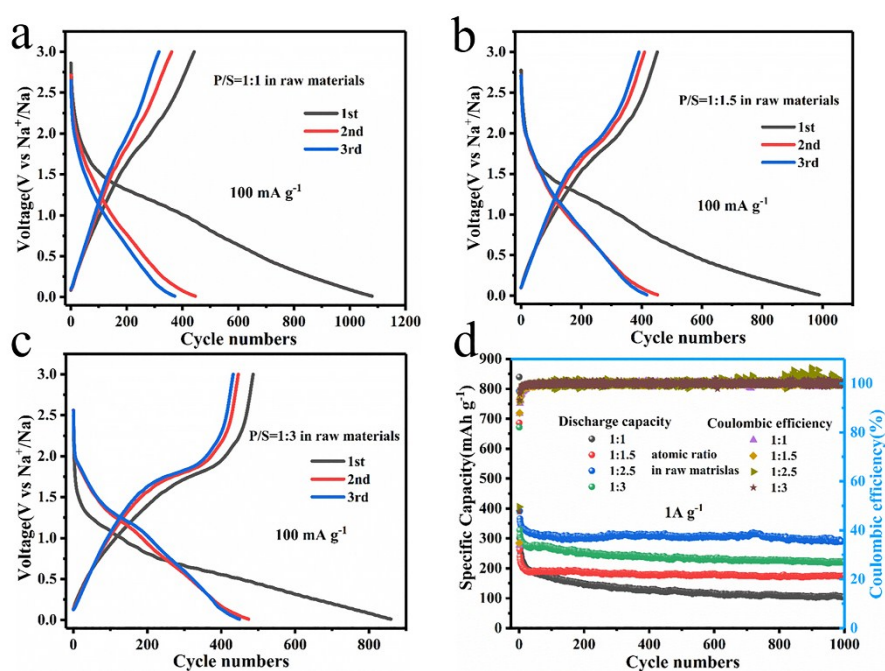

Figure S7. (a), (b), (c) the charge and discharge voltage profiles, (d) the long cycle performances of PSCs obtained at 500°C with the atomic ratios of P to S in the raw materials is 1:1, 1:1.5, 1:3.

The atomic ratio of P to S doped in PSC can be controlled by adjusting the atomic ratio of P to S in the raw materials. Specifically, 100mg RP and different volumes (100, 150, 250 and 300  $\mu$ l) of CS<sub>2</sub> are sealed in the quartz tube then sintered at 500 °C for 24 h. The practical P/S atomic ratios in PSCs are shown in Table S1. The charge and discharge curves of these PSCs are obtained at 100 mA g<sup>-1</sup> as shown in Figure S7, it is

found that the PSCs deliver the initial discharge/charge capacities of 1079.8/442, 988.4/452.0, 972.6/519.9 and 859.2/486.2 mAh g<sup>-1</sup> with the initial coulombic efficiency of 40.9%, 45.7%, 53.4% and 56.6%, corresponding the atomic ratios P to S of 0.85, 0.66, 0.47 and 0.48 in the PSCs, respectively. Obviously, the capacity of PSC increases with the P/S atomic ratio decreases. When the P/S atomic ratio lowers to the minimum value of 0.47 (corresponding to 100 mg RP with 250 μl CS<sub>2</sub> in the raw materials), PSC can reach the highest capacity of 519.9 mAh g<sup>-1</sup> and excellent cycling (Figure S7d).

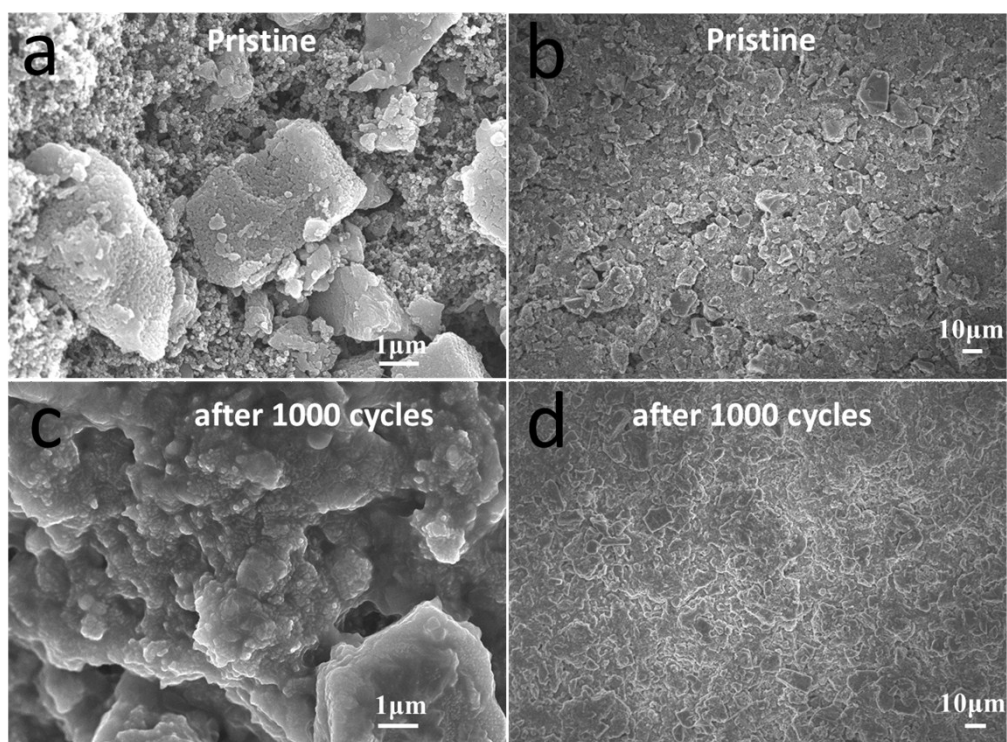

Figure S8. The SEM images of PSC electrode before and after 1000 cycles at 1A g<sup>-1</sup>



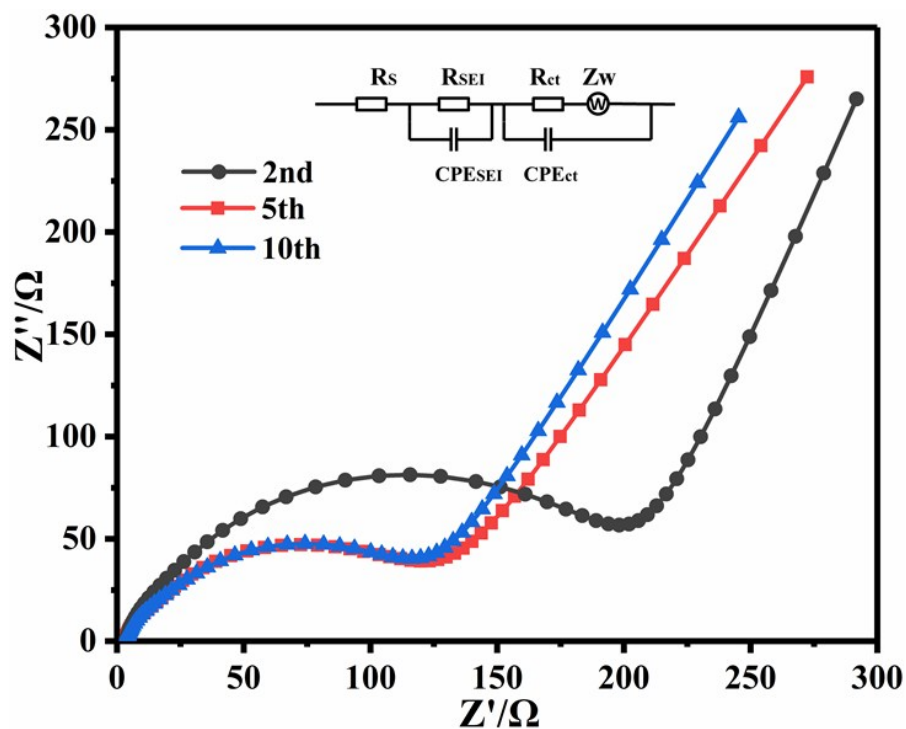

Figure S9. The Nyquist plots of the PSC after various cycles at 50mA g<sup>-1</sup>

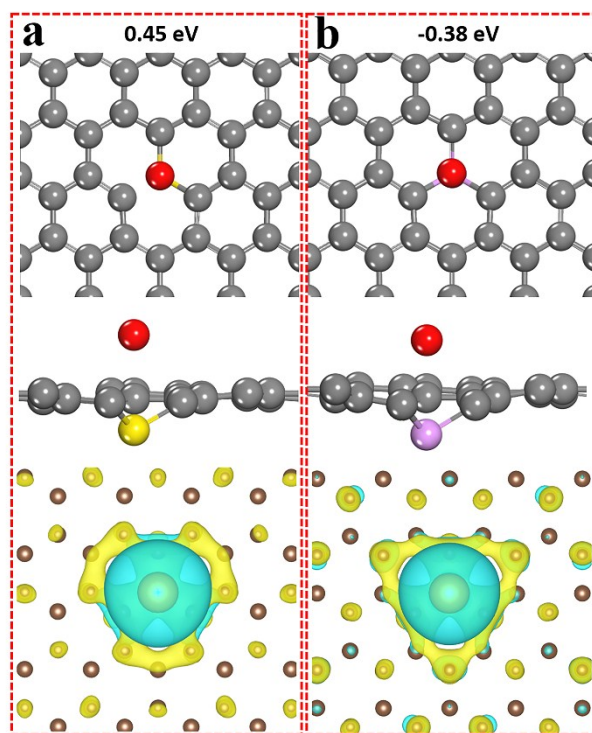

Figure S10. the optimized structure of (a) single S-doped carbon, (b) single P-doped carbon after adsorbed with sodium ion and the corresponding differential charge density (DCD) maps. (For the structure, Gray, yellow, pink, red represents C, S, P, Na ions,

respectively; For DCD, yellow and cyan isosurfaces represent the charge accumulation and depletion in the system, respectively.)

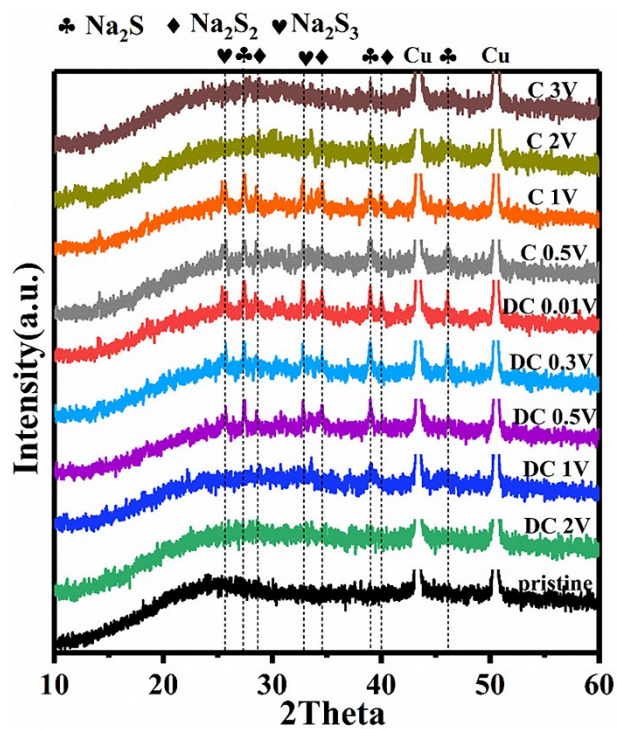

Figure S11. The XRD patterns of PSC tested at different charge-discharge states.

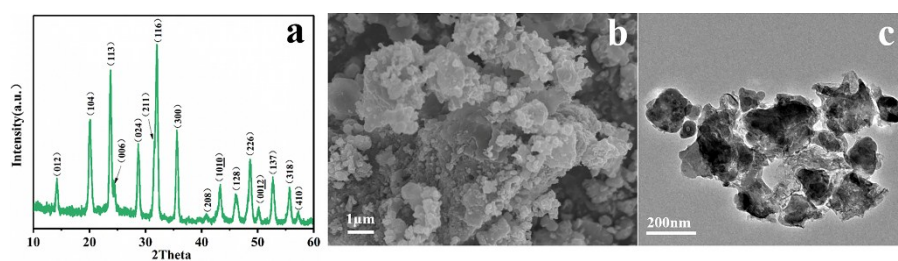

Figure S12. (a) the XRD pattern, (b) SEM, (c) TEM images of the NVP@C.

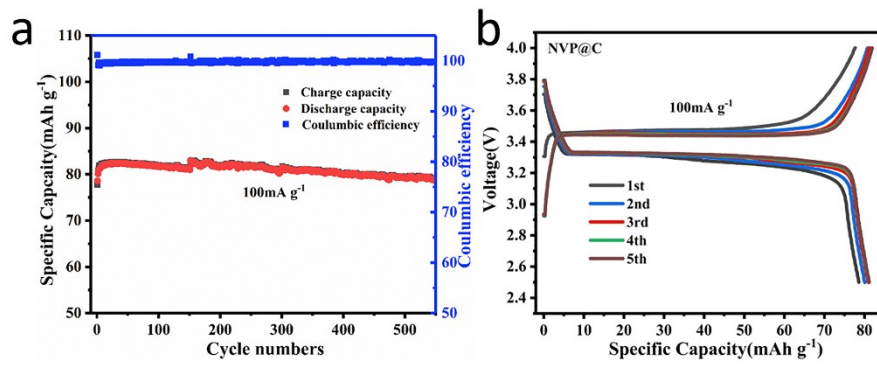

Figure S13. (a) the cycling performance of NVP@C at 100mA g<sup>-1</sup>, (b) the charge-discharge curves of NVP@C at 100 mA g<sup>-1</sup>.
